# Supplementary material
Source: MDPI journal article supplement (https://www.mdpi.com/2673-8023/2/1/10)
Supplement: s1 [file s1 › micro-1606593-supplementary.pdf]

Supplementary information

# A biomimetic strategy for the fabrication of micro- and nanodiamond composite films.

Kayla Baker and Igor Zhitomirsky\*

Department of Materials Science and Engineering, McMaster University, Hamilton, ON L8S4L7, Canada; bakerk9@mcmaster.ca (K.B.); zhitom@mcmaster.ca (I.Z.)

\* Correspondence: zhitom@mcmaster.ca (I.Z.)

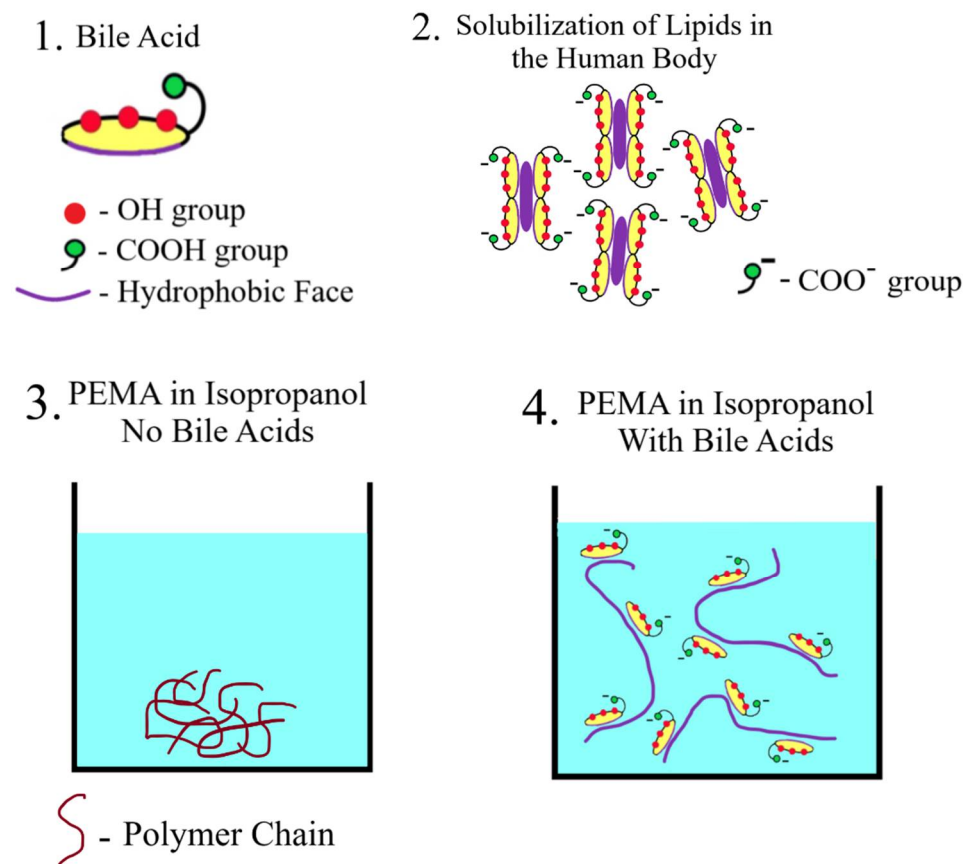

**Citation:** Baker, K.; Zhitomirsky, I. A biomimetic strategy for the fabrication of micro- and nanodiamond composite films. *Micro* **2022**, *2*, Firstpage-Lastpage.  
<https://doi.org/10.3390/xxxxx>

Academic Editor: Firstname Last-name

**Publisher's Note:** MDPI stays neutral with regard to jurisdictional claims in published maps and institutional affiliations.

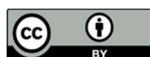

**Copyright:** © 2022 by the authors. Submitted for possible open access publication under the terms and conditions of the Creative Commons Attribution (CC BY) license (<https://creativecommons.org/licenses/by/4.0/>).

**Schematic 1:** Illustration of the general chemical structure of a bile acid (1), bile acids solubilization of lipids within the human body (2), insoluble PEMA in isopropanol (3), and PEMA solubilized in isopropanol by the addition of bile acids (4).

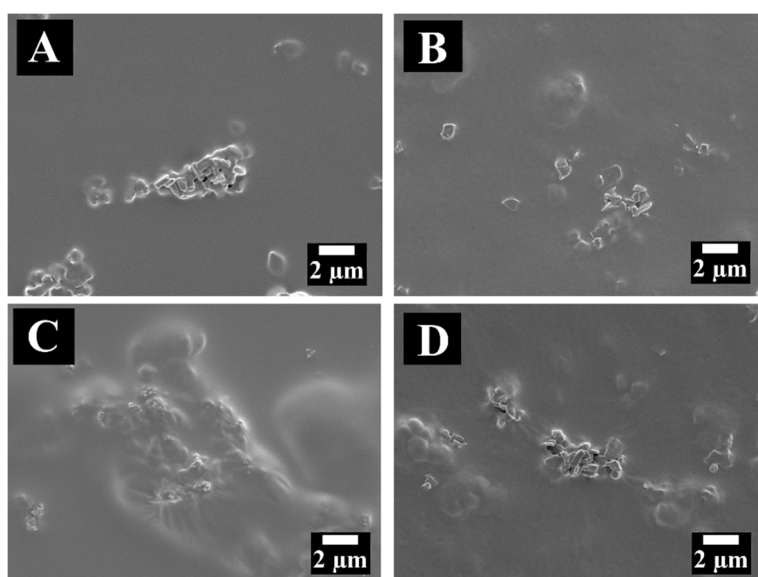

**Figure S1.** SEM micrographs of films prepared from 10 gL<sup>-1</sup> PEMA solutions containing (A,B) 1 gL<sup>-1</sup> MD and (C,D) 1 gL<sup>-1</sup> ND (A) with (A,C) 3 gL<sup>-1</sup> UDCA (B,D) 3 gL<sup>-1</sup> HDCA.

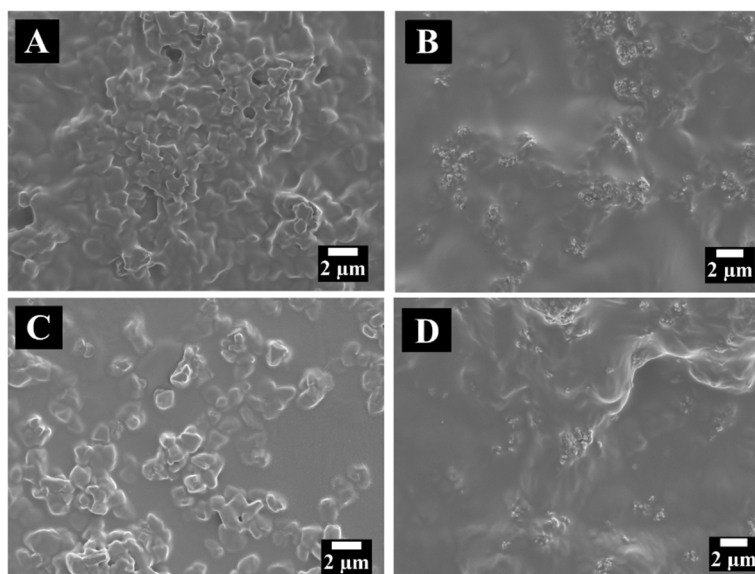

**Figure S2.** SEM micrographs of films prepared from 10 gL<sup>-1</sup> PEMA solutions containing (A,B) 3 gL<sup>-1</sup> MD and (C,D) 3 gL<sup>-1</sup> ND (A) with (A,C) 3 gL<sup>-1</sup> UDCA (B,D) 3 gL<sup>-1</sup> HDCA.
